# Supplementary material for: 3D Printing of High Viscosity Reinforced Silicone Elastomers
Source: MDPI journal article supplement (doi:10.3390/polym13142239), 2021-07-08
Supplement: s1 [file s1]

# 3D Printing of High Viscosity Reinforced Silicone Elastomers

Nicholas Rodriguez <sup>1,2,†</sup>, Samantha Ruelas <sup>3,†</sup>, Jean-Baptiste Forien <sup>3</sup>, Nikola Dudukovic <sup>1</sup>, Josh DeOtte <sup>1</sup>, Jennifer Rodriguez <sup>3</sup>, Bryan Moran <sup>1</sup>, James P. Lewicki <sup>1</sup>, Eric B. Duoss <sup>1</sup> and James S. Oakdale <sup>3,\*</sup>

<sup>1</sup> Materials Engineering Division, Lawrence Livermore National Laboratory, 7000 East Avenue, Livermore, CA 94550, USA; nick.rodriguez@utexas.edu (N.R.); dudukovic1@llnl.gov (N.D.); deotte1@llnl.gov (J.D.); moran5@llnl.gov (B.M.); lewicki1@llnl.gov (J.P.L.); duoss1@llnl.gov (E.B.D.)

<sup>2</sup> Department of Mechanical Engineering, The University of Texas at Austin, 204 E. Dean Keeton Street, Austin, TX 78712, USA

<sup>3</sup> Materials Science Division, Lawrence Livermore National Laboratory, 7000 East Avenue, Livermore, CA 94550, USA; ruelas7@llnl.gov (S.R.); forien1@llnl.gov (J.-B.F.); rodriguez96@llnl.gov (J.R.)

\* Correspondence: oakdale1@llnl.gov; 925-424-4157.

† N.R. and S.R. contributed equally.

## Table of Contents

Figure S1: Measured Intensity at the build plate as function of aperture diameter. (pg SI-2)

Table S1: Solubility of photo-initiator components in TEMQ-1. (pg SI-2)

Figure S2: Viscosity of VTS-2 + MFS-1 as a function of silica content. (pg SI-2)

Figure S3: ASTM D638 tensile testing for TEFS-1 through TEFS-4 compared to 'bulk' specimen. (pg SI-3)

Figure S4.: Tensile data for TEFS-1 specimens. (pg SI-3)

Figure S5: Tensile data for TEFS-2 specimens. (pg SI-3)

Figure S6: Tensile data for TEFS-3 specimens. (pg SI-4)

Figure S7: Tensile data for TEFS-4 specimens. (pg SI-4)

Figure S8: DSC analysis of TEFS1-4. (pg SI-5)

Figure S9: Resin Shear modulus as a function of filler concentration (wt%). (pg SI-5)

Figure S10: Tensile data for TEFS-5 specimens. (pg SI-6)

Figure S11: Tensile data for TEFS-6 specimens. (pg SI-6)

Figure S12: Tensile data for TEMQ-1 specimens. (pg SI-7)

Figure S13: Tensile data for TEMQ-2 specimens. (pg SI-7)

Figure S14: Tensile data for TEMQ-3 specimens. (pg SI-7)

Figure S15: Tensile data for TEMQ-4 specimens. (pg SI-7)

Figure S16: Layer thickness as a function of photo-absorber. (pg SI-8)

Figure S17 Stress vs strain data for a TEFS-3 octet truss lattice compressed to 87% strain. (pg SI-8)

**Citation:** Rodriguez, N.; Ruelas, S.; Forien, J.-B.; Dudukovic, N.; DeOtte, J.; Rodriguez, J.; Moran, B.; Lewicki, J.P.; Duoss, E.B.; Oakdale, J.S. 3D Printing of High Viscosity Reinforced Silicone Elastomers. *Polymers* **2021**, *13*, 2239.  
<https://doi.org/10.3390/polym13142239>

Academic Editor: Jia Min Lee

Received: 7 June 2021

Accepted: 2 July 2021

Published: 8 July 2021

**Publisher's Note:** MDPI stays neutral with regard to jurisdictional claims in published maps and institutional affiliations.

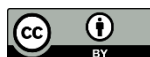

**Copyright:** © 2021 by the authors. Licensee MDPI, Basel, Switzerland. This article is an open access article distributed under the terms and conditions of the Creative Commons Attribution (CC BY) license (<http://creativecommons.org/licenses/by/4.0/>).

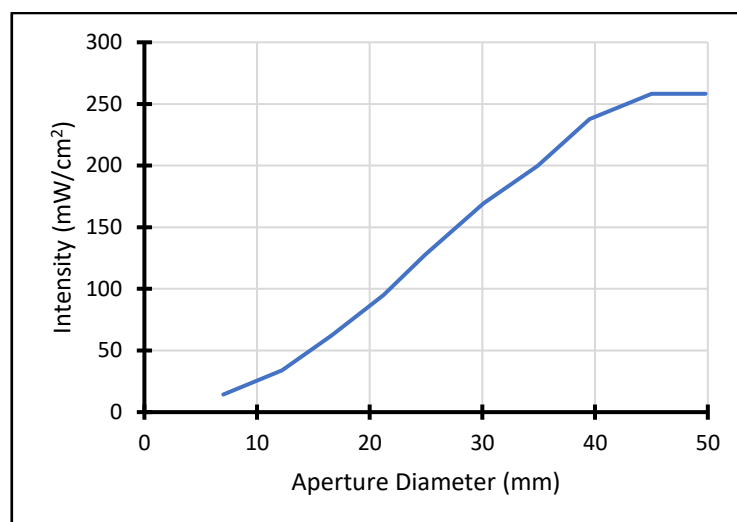

**Figure S1.** Measured intensity at the build plate as a function of aperture diameter. An aperture diameter of 12.2 mm was used for the curing discussed in this research with a resulting maximum intensity of 34 mW/cm<sup>2</sup> at the build plane.

**Table S1.** Solubility of photo-initiator components in TEMQ-1. Compounds were dissolved in 0.25 mL THF and added to 2.5 grams of TEMQ-1 and mixed via planetary centrifugal Thinky mixing. The resulting mixture was left open to the atmosphere to allow the THF to escape and solubility was checked after seven days. A lack of solubility was noted for samples that either turned cloudy or formed a noticeable precipitate.

| Reagent                                                 | Role       | Solubility in PDMS (wt%) |
|---------------------------------------------------------|------------|--------------------------|
| Isopropylthioxanthone (ITX)                             | Sensitizer | 0.15                     |
| 2-ethylhexyl 4-(dimethylamino)benzoate (EHDA)           | Initiator  | 2.4                      |
| 2-(2H-benzotriazol-2-yl)-4,6-di-tert-pentylphenol (BTA) | Absorber   | 0.24                     |
| 2,5-Bis(5-tert-butyl-benzoxazol-2-yl)thiophene          | Absorber   | 0.003                    |
| 4-methoxyhydroquinone (MEHQ)                            | Inhibitor  | 0.20                     |
| Ethyl (2,4,6-trimethylbenzoyl) phenylphosphinate        | Initiator  | 0.12                     |
| 9,10-diethoxyanthracene                                 | Sensitizer | 0.06                     |
| Camphorquinone                                          | Sensitizer | 1.2                      |

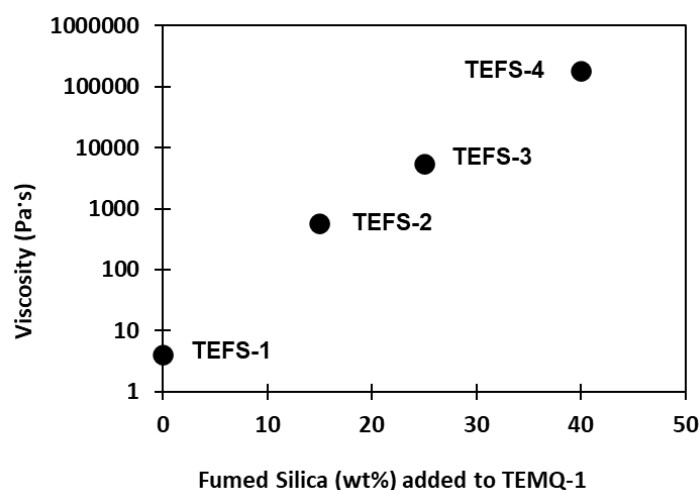

**Figure S2.** Viscosity of VTS-2 + MFS-1 as a function of silica content. TEMQ-1 = 0 phr. TEMQ-2 = 10 phr. TEMQ-3 = 25 phr. TEMQ-4 = 33 phr.

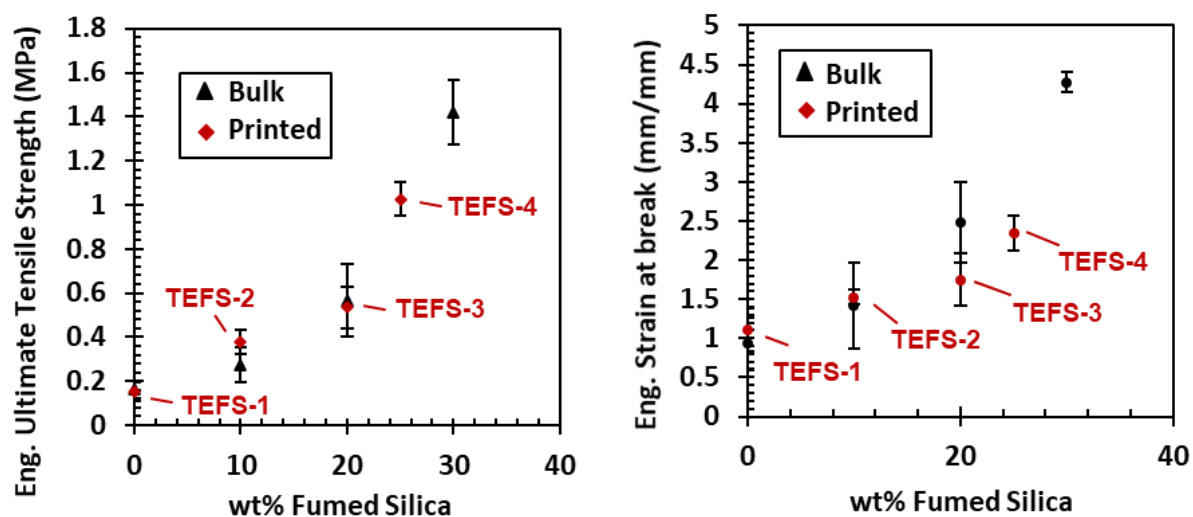

**Figure S3.** ASTM D638 tensile testing for TEFS-1 through TEFS-4 compared to 'bulk' specimen. TEFS samples were 3D printed (red diamond) in the XY orientation at 405 nm 34 mW/cm<sup>2</sup>. Bulk samples from which ASTM D638 specimen were die-cut, were cast in 3 mm thick sheet and cured under a 405 nm 250 mW/cm<sup>2</sup> LED flood lamp.

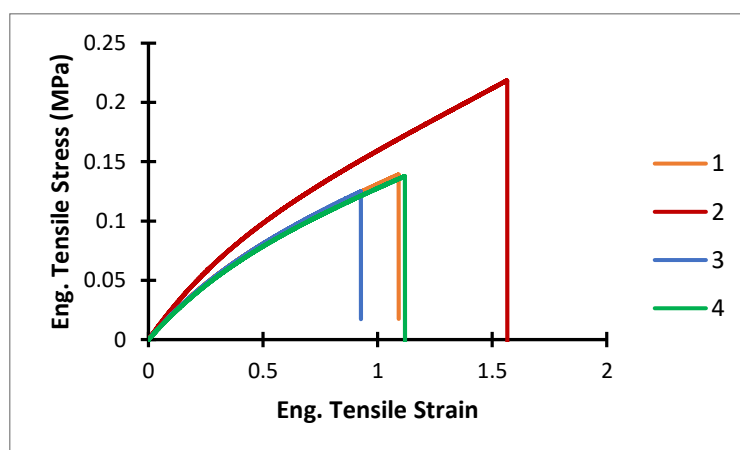

**Figure S4.** Tensile data for TEFS-1 specimens.

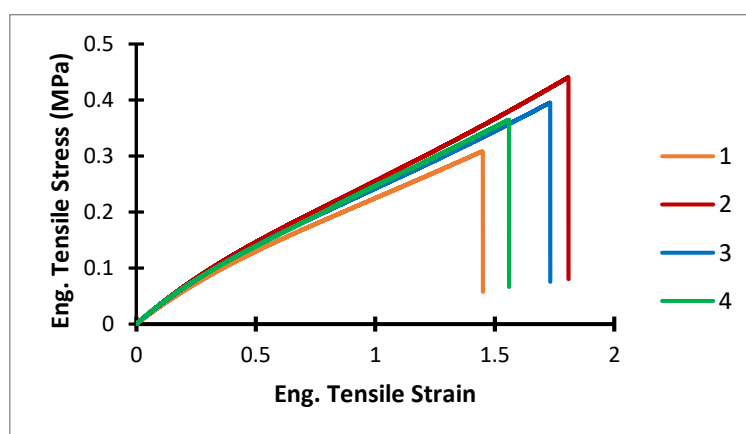

**Figure S5.** Tensile data for TEFS-2 specimens.

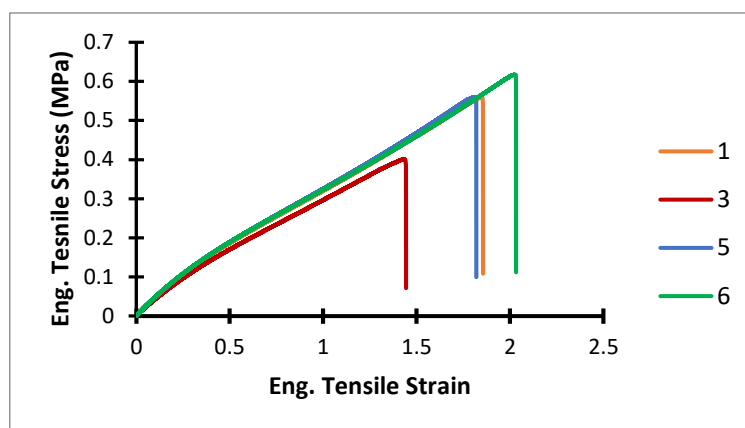

Figure S6. Tensile data for TEFS-3 specimens.

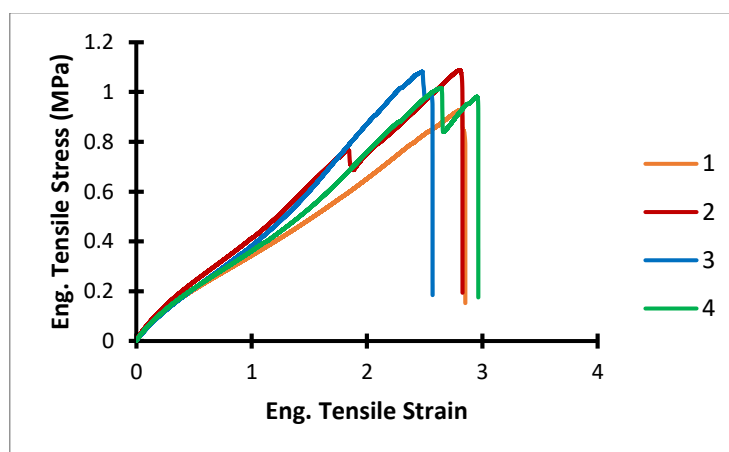

Figure S7. Tensile data for TEFS-4 specimens.

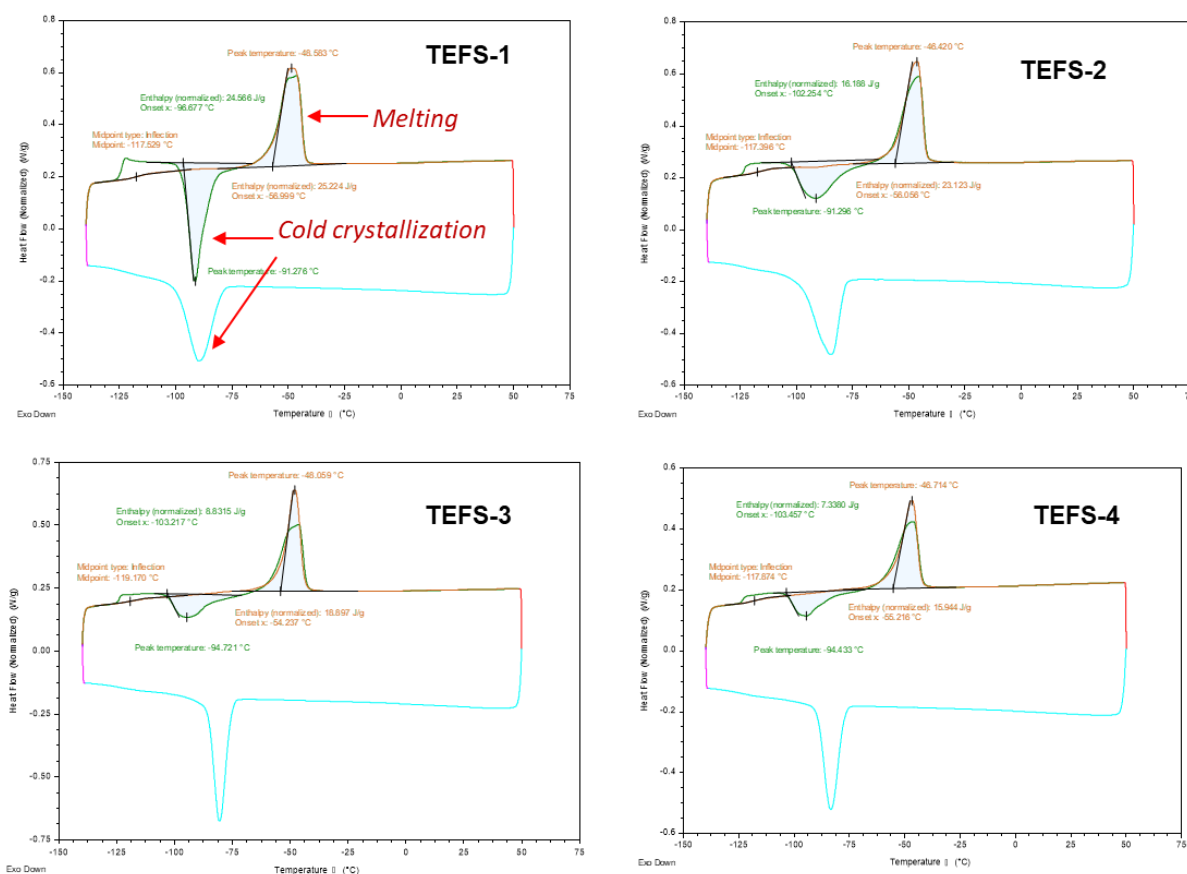

**Figure S8.** DSC analysis of TEFS1-4. Green trace corresponds to heating from -147 °C to 50 °C at 10 °C per min following quench freezing for one minute. The Light blue trace corresponds to cooling from 50 °C to -147 °C at 10 °C per min. The orange trace corresponds to a final heat through the entire range of temperatures observed.

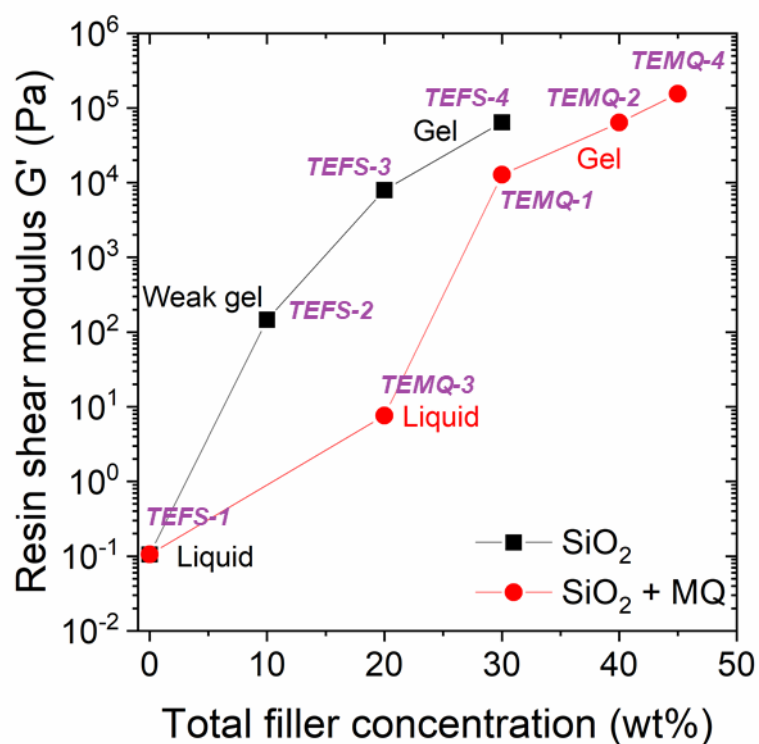

**Figure S9.** Resin shear modulus as a function of filler concentration (wt%).

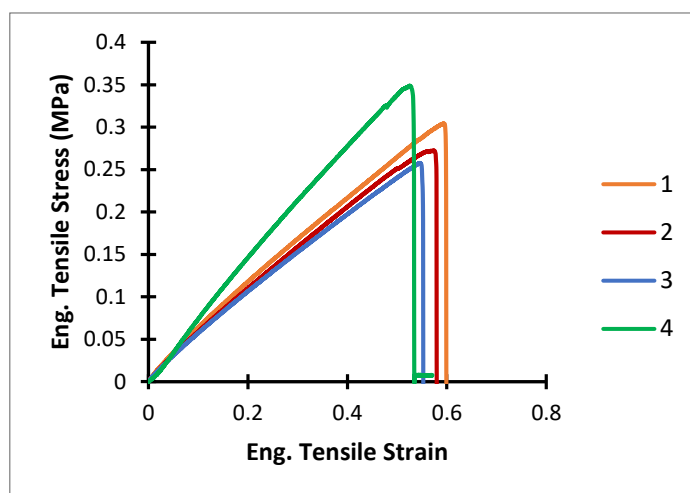

**Figure S10.** Tensile data for TEFS-5 specimens.

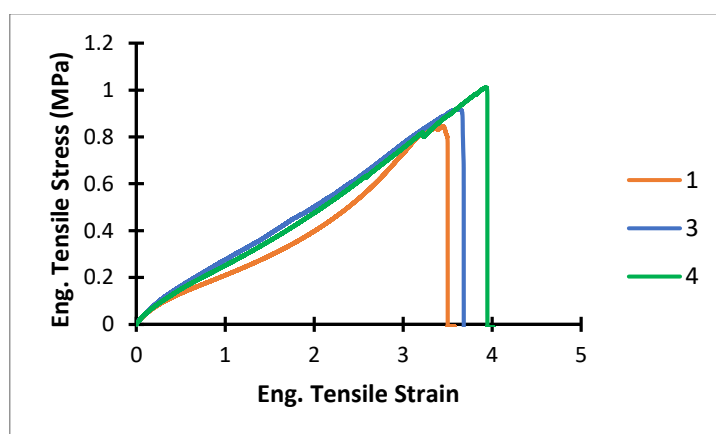

**Figure S11.** Tensile data for TEFS-6 specimens. Specimen 2 slipped during the course of the experiment—no conclusive data was recorded.

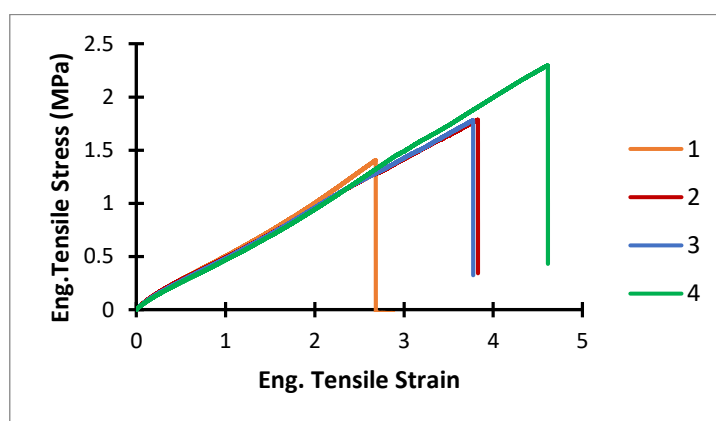

**Figure S12.** Tensile data for TEMQ-1 specimens.

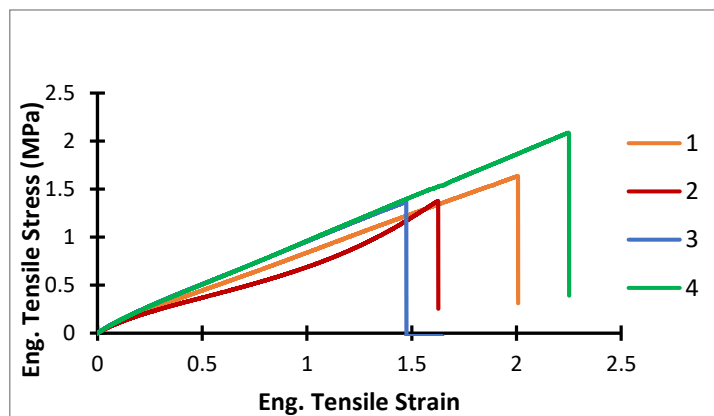

Figure S13. Tensile data for TEMQ-2 specimens.

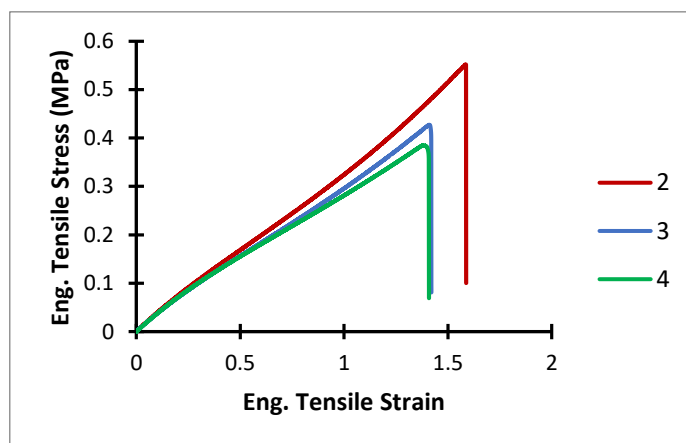

Figure S14. Tensile data for TEMQ-3 specimens. Specimen 1 slipped during the course of the experiment—no conclusive data was recorded.

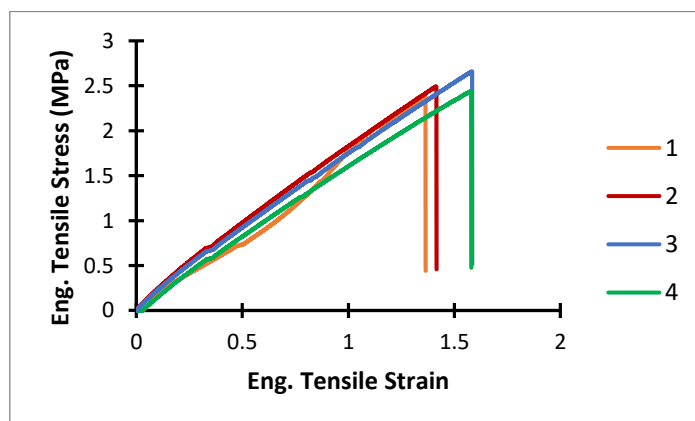

Figure S15. Tensile data for TEMQ-4 specimens.

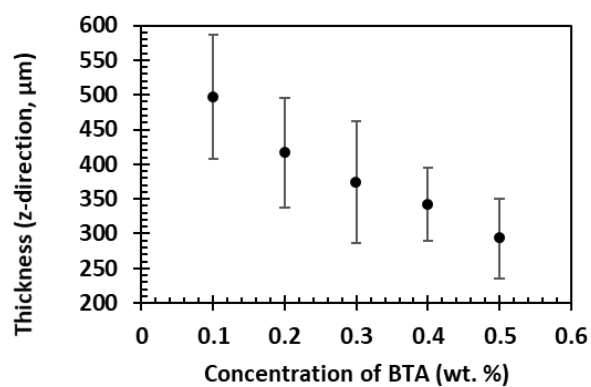

**Figure S16.** Layer thickness as a function of photo-absorber. BTA concentration was varied in order to decrease layer thickness. Higher concentrations decreased layer thickness by approximately 200  $\mu\text{m}$ .

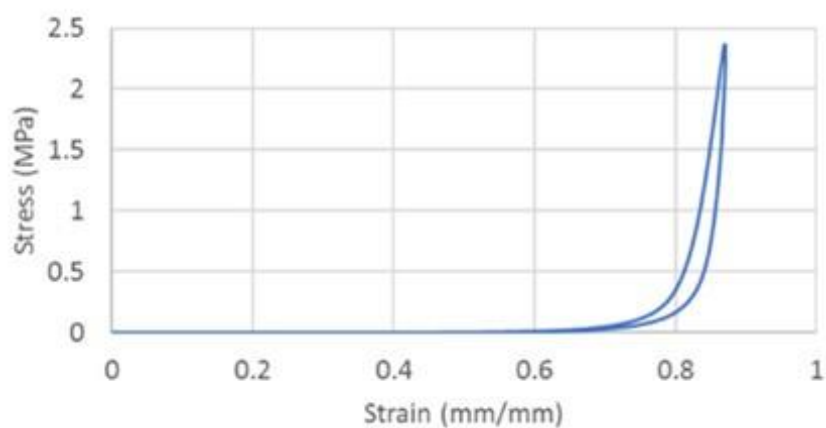

**Figure S17.** Stress vs strain data for a TEFS-3 octet truss lattice compressed to 87% strain.
